# Supplementary material for: A highly sensitive electrochemical IFN-γ aptasensor based on a hierarchical graphene/AuNPs electrode interface with a dual enzyme-assisted amplification strategy
Source: Royal Society of Chemistry journal article supplement (doi:10.1039/c7ra07817j), 2017-01-01
Supplement: c7ra07817j1.pdf [file c7ra07817j1.pdf]

## Supporting Information

### **Highly sensitive electrochemical IFN- $\gamma$ aptasensor based on hierarchical graphene/AuNPs electrode interface with a dual enzyme-assisted amplification strategy**

Yu Yin,<sup>\*a</sup> Lei Shi,<sup>b</sup> Zhenyu Chu<sup>c</sup> and Wanqin Jin<sup>\*c</sup>

<sup>a</sup>*School of Environmental and Chemical Engineering, Jiangsu University of Science and Technology, Zhenjiang 212003, P. R. China. E-mail: season\_july@just.edu.cn. Tel: +86-511-85637630.*

<sup>b</sup>*State Key Laboratory of Lake Science and Environment, Nanjing Institute of Geography and Limnology, Chinese Academy of Sciences, Nanjing 210008, P. R. China.*

<sup>c</sup>*State Key Laboratory of Materials-Oriented Chemical Engineering, College of Chemical Engineering, Nanjing Tech University, Nanjing 210009, P. R. China. E-mail: wqjin@njtech.edu.cn. Tel: +86-25-83172266. Fax: +86-25-83172292.*

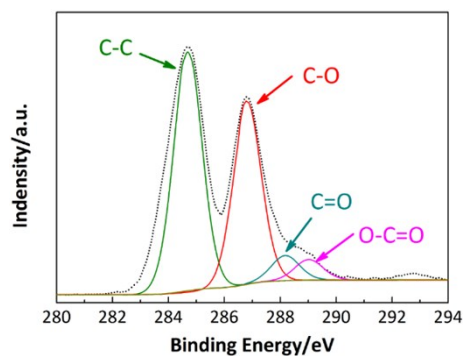

**Fig. S1** The C1s XPS spectrum of GO.

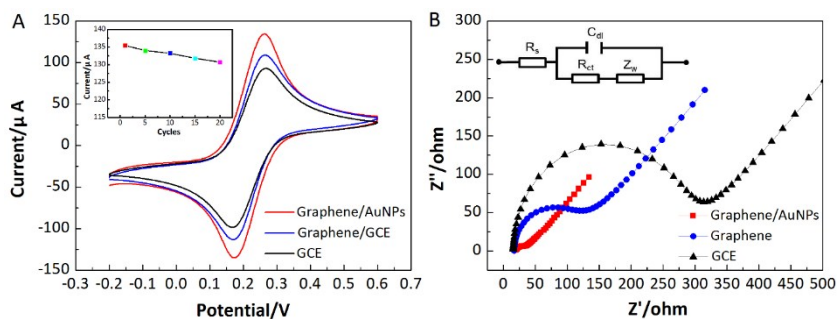

**Fig. S2** (A) Cyclic voltammograms of bare GCE, graphene and graphene/AuNPs modified GCE at a scan rate of 50 mV s<sup>-1</sup>. Inset is the stability test with consecutive 20 cycles. (B) Nyquist diagrams of bare GCE, graphene and graphene/AuNPs modified GCE recorded from 0.1 Hz to 100 kHz. Inset is the related equivalent circuit.

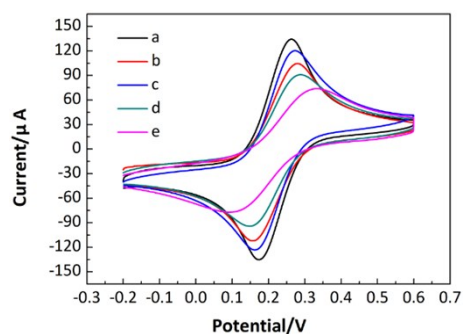

**Fig. S3** Cyclic voltammograms of different interfaces, (a) graphene/AuNPs modified electrode, (b) duplex DNA strands and TH molecules immobilized electrode, (c) in the presence of IFN- $\gamma$  and RecJf exonuclease, (d) hybridization with linker probes, (e) incubation with reporter probes.

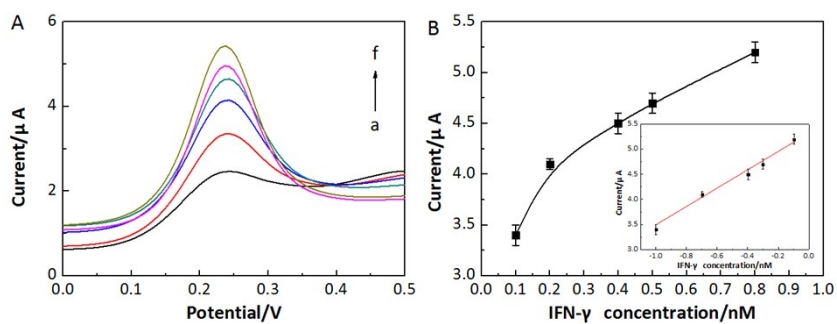

**Fig. S4** (A) DPV responses of the aptasensor after the incubation with different IFN- $\gamma$  concentrations (from a to f, 0, 0.1 nM, 0.2 nM, 0.4 nM, 0.5 nM and 0.8 nM respectively). (B) Calibration curve corresponding to peak currents of different IFN- $\gamma$  concentrations. Inset: the linear relationship between peak currents vs the logarithm of IFN- $\gamma$  concentrations.

**Table S1** Sequences of oligonucleotides used in this work.

| DNA               | Sequence (5'→3')                                                                                  |
|-------------------|---------------------------------------------------------------------------------------------------|
| Capture probe     | SH/NH <sub>2</sub> -(CH <sub>2</sub> ) <sub>6</sub> - GGG TTG GAC ACA ACA CCC AAC ACA ACC AAC CCC |
| Aptamer           | AAA GGG GTT GGT TGT GTT GGG TGT TGT GTC CAA CCC C                                                 |
| Linker probe      | Biotin-IAG CTT TAG AGA CTG ATG TTG A GGG GTT GGT TGT GTT GGG TGT TGT GTC                          |
| Reporter probe-I  | Biotin-T CAA CAT CAG TCT CTA AAG CTA CCA TGT GTT AGC TTT AGA GAC T                                |
| Reporter probe-II | Biotin-T AGC TTT AGA GAC TGA TGT TGA AGT CTC TAA AGC TAA CAC ATG G                                |

**Table S2** Performance comparison of various electrochemical IFN- $\gamma$  aptasensors.

| Methods          | Techniques | Linear range | Detection limit | Detection time | References |
|------------------|------------|--------------|-----------------|----------------|------------|
| Electro-chemical | SWV        | 0.06–10 nM   | 60 pM           | ~0.5 h         | 17         |
|                  | CV         | 0.1–100 nM   | 0.1 nM          | ~1 h           | 18         |
|                  | SWV        | 0.01–10 nM   | 1.14 pM         | ~2 h           | 55         |
|                  | DPV        | 0.5–300 nM   | 0.3 nM          | ~5.5 h         | 56         |
|                  | SWV        | 0.06–29.6 nM | 77 pM           | /              | 57         |
|                  | EIS        | 0.02–0.11 nM | 11.56 pM        | ~0.5 h         | 58         |
|                  | DPV        | 50 fM–3.0 pM | 16.3 fM         | ~3.5 h         | 59         |
|                  | DPV        | 0.005–5 nM   | 2 pM            | ~5 h           | This work  |

<sup>[a]</sup>Detection time is calculated from the IFN- $\gamma$  injection to the readout of the response signal.

## References

17. Y. Liu, N. Tuleouva, E. Ramanculov and A. Revzin, *Anal. Chem.*, 2010, **82**, 8131.
18. H. Zhang, B. Jiang, Y. Xiang, Y. Chai and R. Yuan, *Analyst*, 2012, **137**, 1020.
55. J. Xia, D. Song, Z. Wang, F. Zhang, M. Yang, R. Gui, L. Xia, S. Bi, Y. Xia, Y. Li and L. Xia, *Biosens. Bioelectron.*, 2015, **68**, 55.
56. J. Zhao, C. Chen, L. Zhang, J. Jiang and R. Yu, *Biosens. Bioelectron.*, 2012, **36**, 129.
57. Y. Chen, T. S. Pui, P. Kongsuphol, K. C. Tang and S. K. Arya, *Biosens. Bioelectron.*, 2014, **53**, 257.
58. S. Ding, C. Mosher, X. Y. Lee, S. R. Das, A. A. Cargill, X. Tang, B. Chen, E. S. McLamore, C. Gomes, J. M. Hostetter and J. C. Claussen, *Acs Sensors*, 2017, **2**, 210.
59. X. M. Miao, C. N. Ko, K. Vellaisamy, Z. B. Li, G. J. Yang, C. H. Leung and D. L. Ma, *Scientific Reports*, 2017, **7**.
